# Supplementary material
Source: PubMed Central journal article supplement (PMC5923077)
Supplement: JVI.02002-17_zjv010183535s1.pdf [file JVI.02002-17_zjv010183535s1.pdf]

## Supplemental Figures and Tables

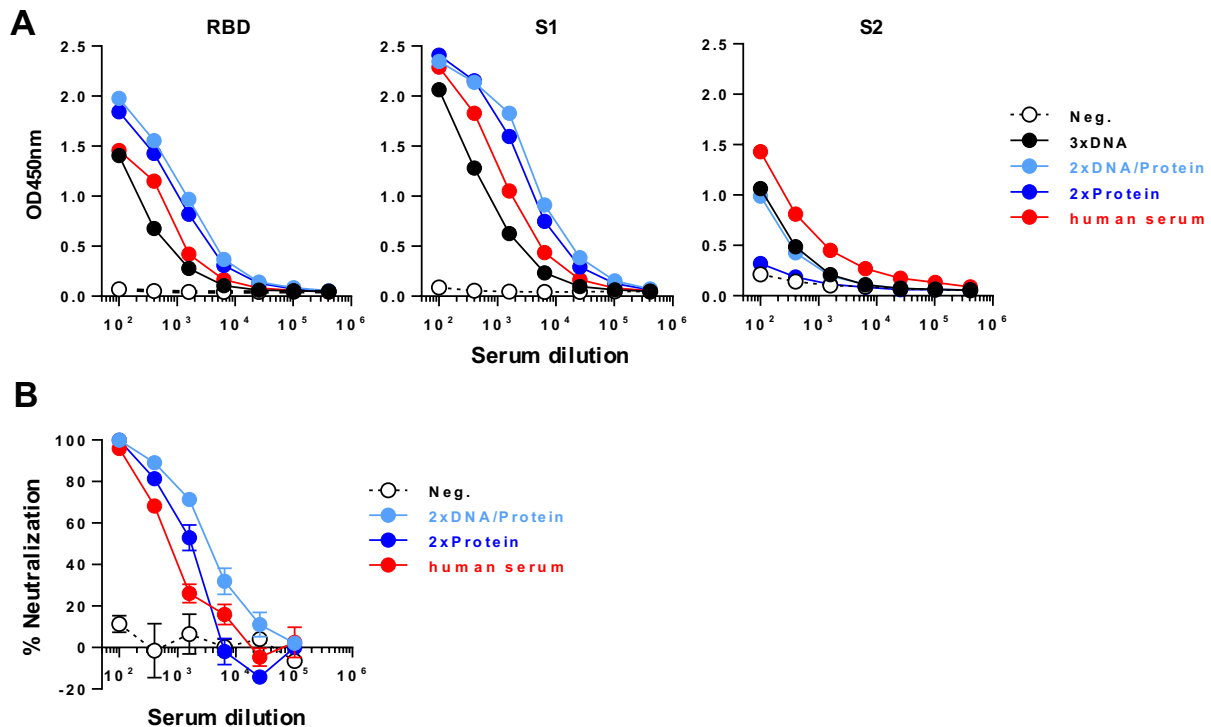

**Fig. S1. Binding of antibodies from immunized NHPs and MERS patient to S1 and S2 subunits of MERS-CoV S. (A)** Binding to MERS-CoV S proteins. Sera from a human donor (three weeks after illness onset) and NHPs immunized with MERS-CoV S DNA three times (3xDNA), primed with S DNA two times and boosted with S1 protein plus Ribi adjuvant (2xDNA/Protein), or primed and boosted with S1 protein plus Ribi adjuvant (2xProtein) (20) were assayed by ELISA for binding to soluble MERS-CoV S proteins, RBD, S1 and S2. **(B)** Neutralization activity. Sera from the human donor and immunized NHPs as described in **Fig. S1A** were assessed for neutralizing activity against MERS-CoV EMC S pseudotyped lentivirus particles. Percent neutralization at different serum dilutions is shown. Data represent the mean of triplicate replicates with standard errors.

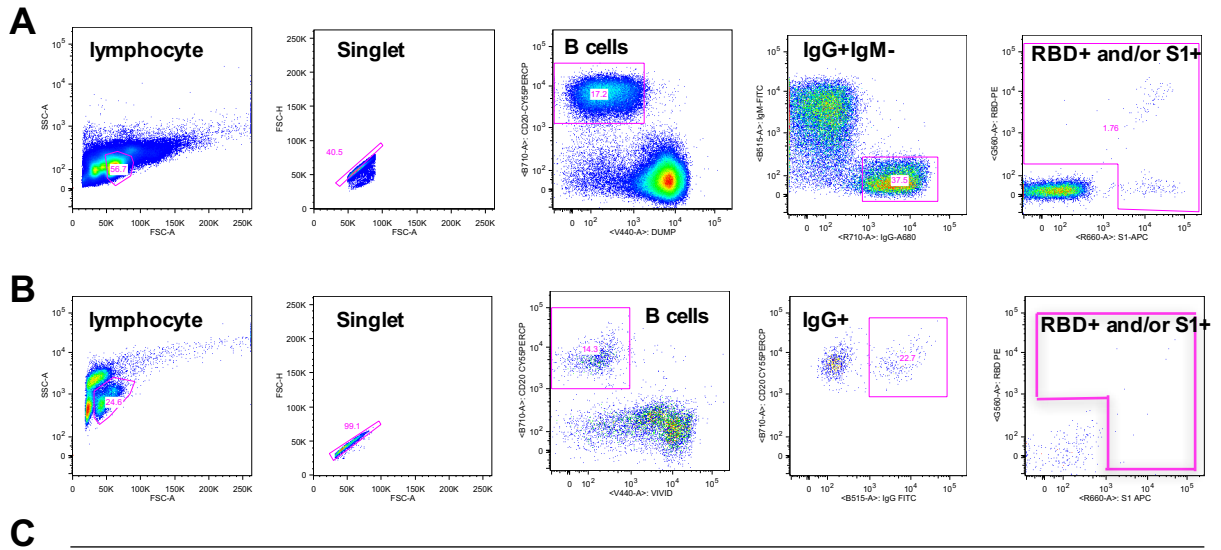

| mAb ID   | Rhesus or human heavy chain V gene | % Divergence (nt) from germline | CDRH3 Sequence (length)        | Rhesus or human light chain V gene | % Divergence (nt) from germline | CDRL3 sequence (length) |
|----------|------------------------------------|---------------------------------|--------------------------------|------------------------------------|---------------------------------|-------------------------|
| JC57-11  | Macmul IGHV4-2*01F                 | 9%                              | CAREPFKYCSGGVGYAHKDNSLDVW (23) | Macmul IGKV3-9*01                  | 5%                              | CYQHSSGYTF (8)          |
| JC57-14  | Macmul IGHV4-2*01F                 | 3%                              | CAKTYSGTFDYW (10)              | Macmul IGKV1-20*01                 | 9%                              | CQYNNSPYSF (9)          |
| JC57-13  | Macmul IGHV4-2*01F                 | 7%                              | CARLLPLGGGYCFDYW (14)          | Macmul IGKV2S17*01                 | 5%                              | CMQSVYPPFTF (9)         |
| FIB-H1   | Macmul IGHV1-1*01F                 | 17%*                            | CAASSGSYGVSSLDVW (14)          | Macmul IGLV11-1*01F                | 1%                              | CQVYDSSANWVF (10)       |
| CDC2-C2  | IGHV1-69*14F                       | 5%                              | CAREGGHQGYCSGGSCYDFDYW (20)    | IGKV2-28*01 F                      | 1%                              | CMQALQTPAF (8)          |
| CDC2-C5  | IGHV4-39*01F                       | 0%                              | CASLLRPLYCSGGSCDYW (18)        | IGLV2-14*01 F                      | 1%                              | CSSYTSNITLVF (10)       |
| CDC2-A2  | IGHV3-11*01F                       | 1%                              | CARVGLSGGWYDWFDPW (15)         | IGLV1-40*01 F                      | 1%                              | CQSYDSSLGCVVF (11)      |
| CDC2-A10 | IGHV1-69*01 F or IGHV1-69D*01 F    | 3%                              | CARGSRSSSAEYFQHW (15)          | IGLV2-11*01 F                      | 1%                              | CCSYAGSYTLEVVF (12)     |

\*including deletions

**Fig. S2. Isolation of MERS-CoV RBD- and/or S1-specific B cells. (A) and (B)** Gating strategy for isolating memory B cells from rhesus macaques (A) and a human donor (B). Macaque and human PBMCs were stained with a viability marker and CD3/CD4/CD8/CD14 antibodies to exclude T cells and monocytes, antibodies to CD20/IgG/IgM (for NHP) or CD20/IgG (for human), and MERS-CoV S1 and RBD probes to select MERS-CoV specific memory B cells. RBD+ and/or S1+ single B cells were sorted into 96-well plates for isolation of mAbs. **(C)** Genetic characteristics of mAbs. The top four mAbs were isolated from rhesus macaques, while the bottom four mAbs were from a human donor. The heavy/light chain genes, % divergence relative to

germline sequence and CDR3 lengths were analyzed with IMGT/V-QUEST website tool ([http://www.imgt.org/IMGT\\_vquest/share/textes/](http://www.imgt.org/IMGT_vquest/share/textes/)).

**A**

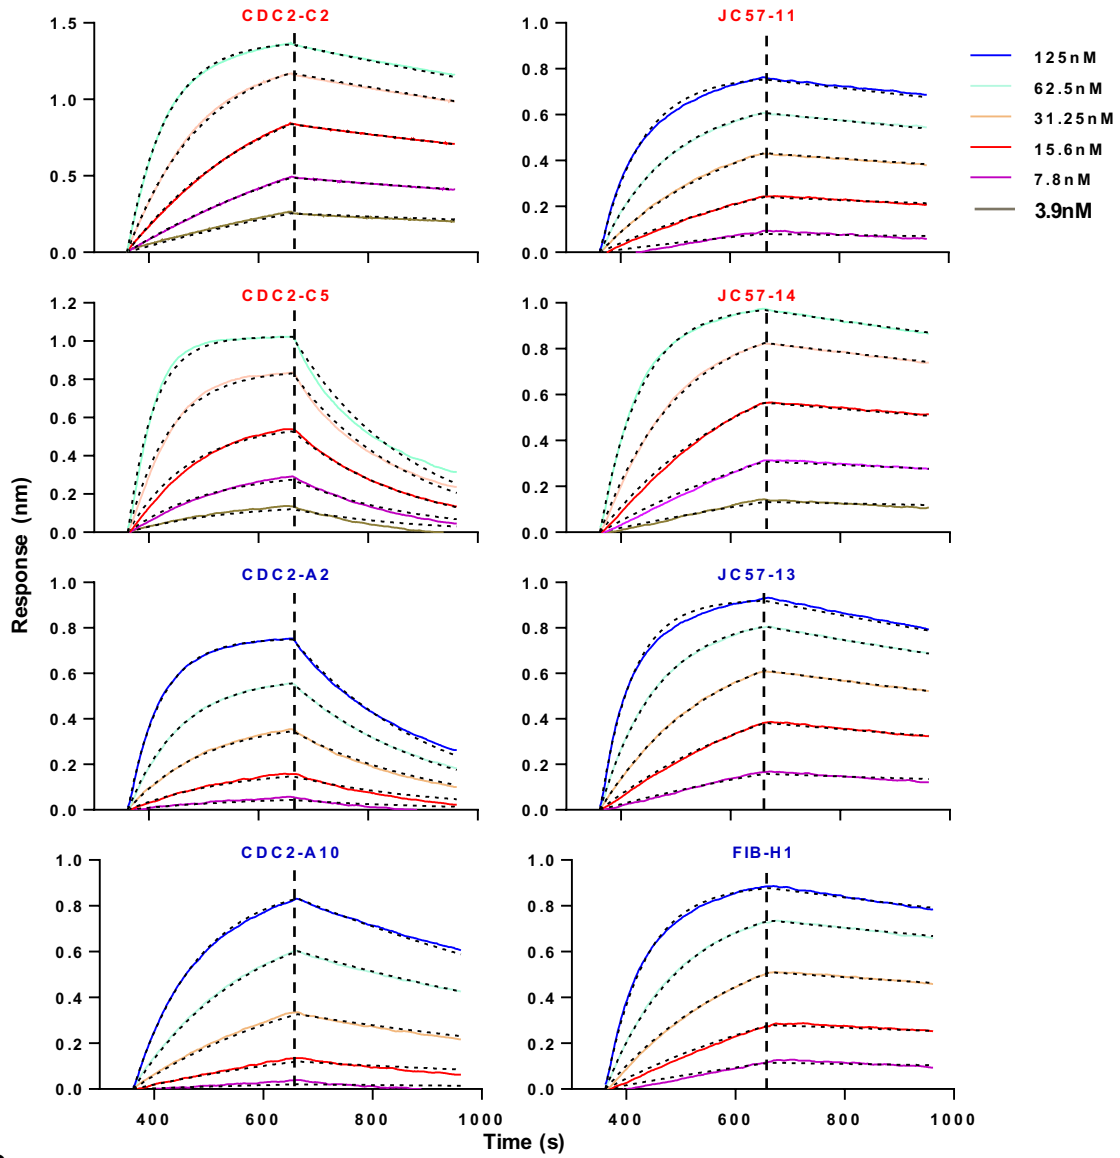

**B**

| mAbs            | Binding Kinetics   |                   |          |
|-----------------|--------------------|-------------------|----------|
|                 | $K_{on}(M s^{-1})$ | $K_{off}(s^{-1})$ | $K_D(M)$ |
| <b>CDC2-C2</b>  | 2.16E+05           | 5.73E-04          | 2.65E-09 |
| <b>CDC2-C5</b>  | 2.65E+05           | 4.66E-03          | 1.75E-08 |
| <b>JC57-11</b>  | 1.01E+05           | 3.63E-04          | 3.61E-09 |
| <b>JC57-14</b>  | 2.10E+05           | 3.56E-04          | 1.70E-09 |
| <b>CDC2-A2</b>  | 1.04E+05           | 3.85E-03          | 3.70E-08 |
| <b>CDC2-A10</b> | 5.75E+04           | 1.16E-03          | 2.01E-08 |
| <b>JC57-13</b>  | 1.45E+05           | 5.34E-04          | 3.68E-09 |
| <b>FIB-H1</b>   | 1.12E+05           | 3.19E-04          | 2.86E-09 |

**Fig. S3. Octet biosensorgrams of MERS-CoV S1 molecules binding to mAbs. (A)**

Human and macaque mAbs were loaded onto anti-human IgG Fc (AHC) probes, and association with MERS-CoV S1 protein was allowed to proceed for 300 s, followed by dissociation for 300 s. Responses were measured in nm using an Octet HTX instrument. The dashed lines represent the best fit of the kinetic data to a 1:1 binding model. All experiments were carried out at 30°C in PBS (pH 7.4) supplemented with 1% BSA to minimize non-specific binding. The dotted vertical line indicates the beginning of dissociation, and the legend indicates MERS-CoV S1 antigen concentrations. **(B)** Binding kinetics in  $K_{on}$  ( $M^{-1}s^{-1}$ ),  $K_{off}$  ( $s^{-1}$ ) and  $K_D$  (M).

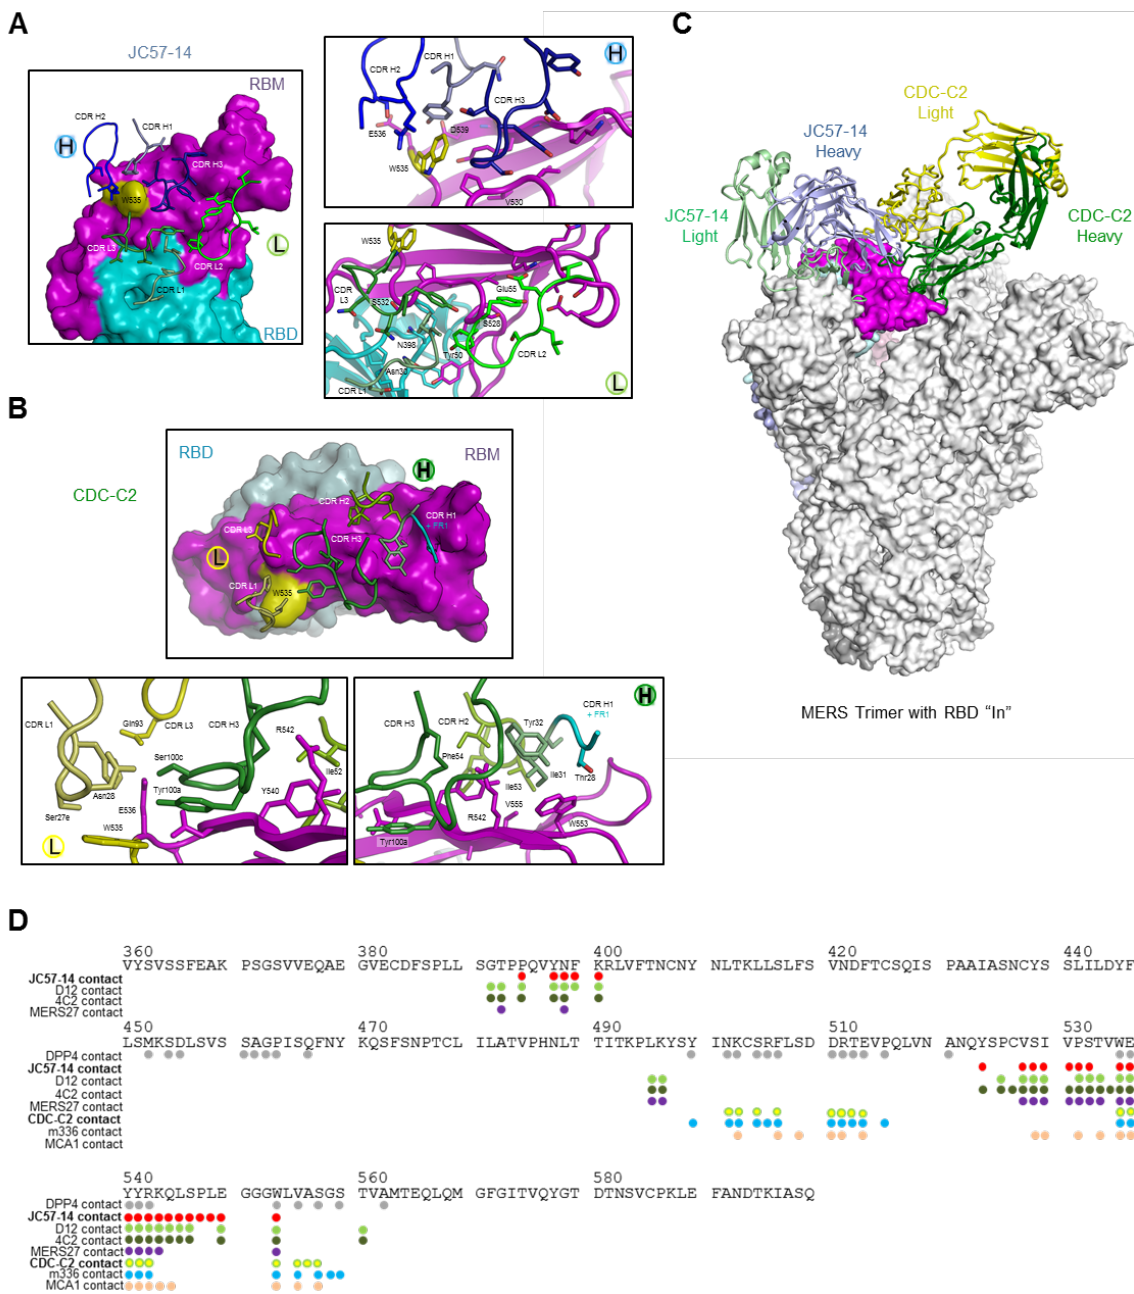

**Fig. S4. Structural analysis of MERS RBD-targeting antibodies. (A)** Crystal structure of JC57-14 in complex with MERS RBD. The MERS RBD is shown in surface representation with antibody CDRs shown in ribbon representation. The antibody-antigen interactions are displayed in two panels centered around the heavy (H) and light (L) chains of JC57-14. The W535 residues is highlighted in yellow as a reference marker, with interacting residue side chains shown in stick representation. **(B)** Crystal

structure of CDC-C2 in complex with MERS *England1* RBD. The RBD is shown in surface representation with interacting CDRs shown in ribbon representation (CDR L2 is not shown). The antibody paratope is displayed in two panels focused on the light chain and CDR H3 interactions (L) and the CDR H1, and CDR H2 interactions (H). **(C)** JC57-14 and CDC-C2 antibodies are modeled on the MERS Spike trimer molecule using an RBD molecule that is located in the "closed" conformation with both antibodies having significant clashes with adjacent protomers of the MERS Spike trimer. **(D)** The amino acid sequence of the MERS *England1* RBD is shown with residues bound by the DPP4 receptor and neutralizing antibodies indicated below the sequence with a circle.

**Fig. S5. IC50 Neutralization titers to MERS-CoV EMC and its mutants for Figure 4a**

| Virus \ mAbs | D12   | JC57-14 | CDC2-C5 | CDC2-C2 | JC57-11 | F11          |
|--------------|-------|---------|---------|---------|---------|--------------|
| EMC          | 0.017 | 0.004   | 0.056   | 0.001   | 0.006   | 0.212        |
| EMC_L506F    | 0.008 | 0.007   | 0.029   | 0.005   | 0.020   | <b>0.004</b> |
| EMC_D509G    | 0.013 | 0.004   | 0.085   | 0.025   | 0.009   | >10          |
| EMC_D509R    | 0.033 | 0.005   | 0.088   | 0.449   | 0.016   | >10          |
| EMC_T512A    | 0.012 | 0.004   | 0.060   | 0.017   | 0.010   | 0.914        |
| EMC_S532P    | 2.927 | 0.011   | 0.072   | 0.002   | 0.005   | 0.172        |
| EMC_V534A    | 4.737 | 0.370   | >10     | 0.017   | 0.032   | 1.508        |
| EMC_W535R    | >10   | >10     | >10     | 0.008   | 0.005   | 0.185        |
| EMC_E536R    | >10   | 0.044   | >10     | 0.013   | 0.020   | 0.454        |
| EMC_D539R    | >10   | 0.900   | >10     | >10     | >10     | 0.133        |
| EMC_Y540H    | 0.012 | 0.004   | 0.057   | 0.521   | 0.405   | <b>0.013</b> |
| EMC_R542G    | 0.010 | 0.005   | 0.078   | >10     | 0.102   | 0.552        |
| EMC_P547S    | 0.018 | 0.011   | 0.064   | 0.004   | 0.011   | 1.237        |

Fully neutralization-resistant
Neutralization activity decreased >10-fold

**Fig. S5. mAb IC50 neutralization titers to MERS-CoV native and mutant S-pseudotyped lentiviruses. Supporting data for Fig. 4A. Six mAbs display a total of four unique neutralization patterns, which are color-coded in blue, red, black and purple**



| Competitor mAbs | Analyte mAbs |         |         |         |         |        |        |         |        |         |          |
|-----------------|--------------|---------|---------|---------|---------|--------|--------|---------|--------|---------|----------|
|                 | D12          | JC57-14 | CDC2-C5 | CDC2-C2 | JC57-11 | F11    | G2     | JC57-13 | FIB-H1 | CDC2-A2 | CDC2-A10 |
| D12             | 100.43       | 100.58  | 102.71  | 100.12  | 100.34  | 3.84   | 6.42   |         |        |         |          |
| JC57-14         | 103.82       | 102.79  | 105.15  | 105.62  | 101.29  | 23.89  | 6.16   |         |        |         |          |
| CDC2-C5         | 103.13       | 100.32  | 101.46  | 103.42  | 100.74  | 11.55  | 16.32  |         |        |         |          |
| CDC2-C2         | 102.26       | 102.22  | 104.00  | 98.44   | 100.15  | 104.00 | -8.92  |         |        |         |          |
| JC57-11         | 105.94       | 105.41  | 108.76  | 107.42  | 104.57  | 109.65 | 0.40   |         |        |         |          |
| F11             | -8.09        | -4.47   | 4.34    | 95.53   | 95.17   | 99.89  | -10.67 |         |        |         |          |
| G2              |              |         |         | 14.51   |         |        | 103.44 | 108.72  | 106.09 | 47.66   | 51.41    |
| JC57-13         |              |         |         | 42.87   |         |        | 100.80 | 115.65  | 112.59 | 36.91   | 52.73    |
| FIB-H1          |              |         |         | 22.64   |         |        | 83.82  | 107.76  | 105.78 | 42.45   | 24.63    |
| CDC2-A2         |              |         |         | 30.89   |         |        | 27.54  | 7.15    | 26.74  | 85.08   | 11.18    |
| CDC2-A10        |              |         |         | 27.85   |         |        | 15.29  | 11.09   | 15.00  | 5.97    | 102.71   |

**Fig. S6. Competition binding of mAbs by Octet.** Competitor mAbs, RBD-specific (in red) and S1-specific (in blue), were tested for binding to His-tagged S1 protein using an anti-penta-his biosensor. Saturating concentrations of analyte mAbs were determined prior to competition assay. Competing and analyte mAbs were sequentially bound to S1 protein loaded onto the biosensor. Percent inhibition of analyte-mAb binding by competing mAbs >90% is highlighted. Percent inhibition of analyte-mAb binding by competing mAbs as measured by ELISA is shown in **Fig. 5**.

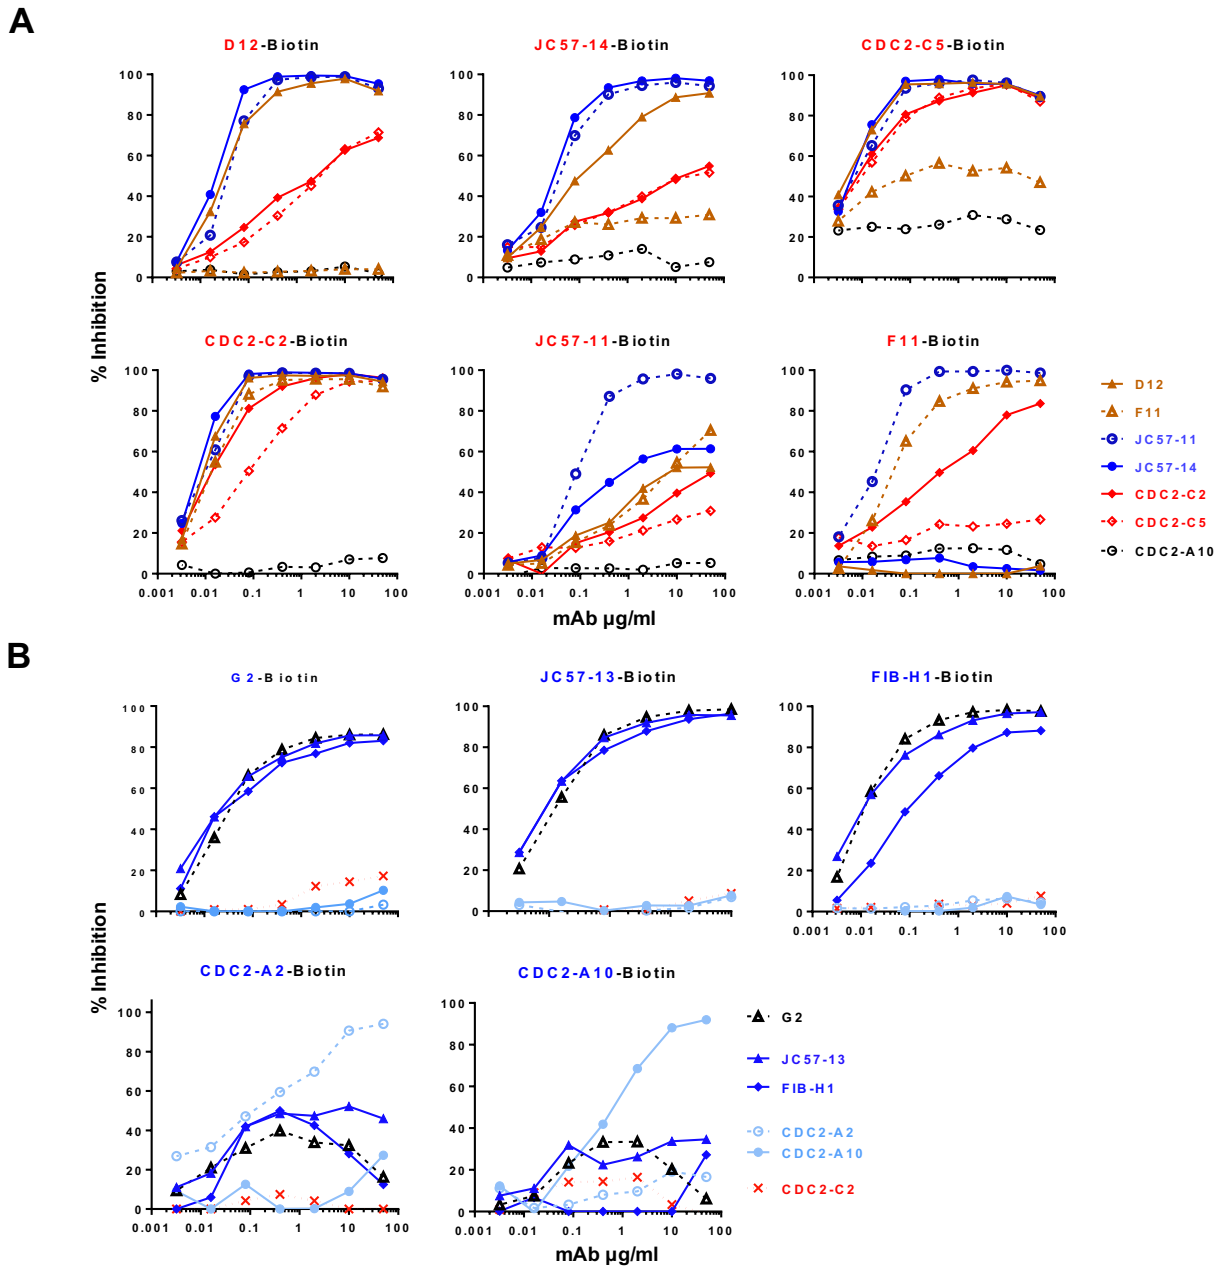

**Fig. S7. Competition binding curves of RBD- and S1-specific mAbs by ELISA.**

Percent inhibition for RBD-specific mAbs in red **(A)** and S1-specific mAbs in blue **(B)**.

F11, D12 and G2 were isolated from immunized mice; JC57-11, JC57-14 and JC57-13 from immunized NHP; and CDC2-C2, CDC2-C5, CDC2-A2 and CDC2-A10 from a human MERS survivor. Summary of percent competitive binding is shown in **Fig. 5**.

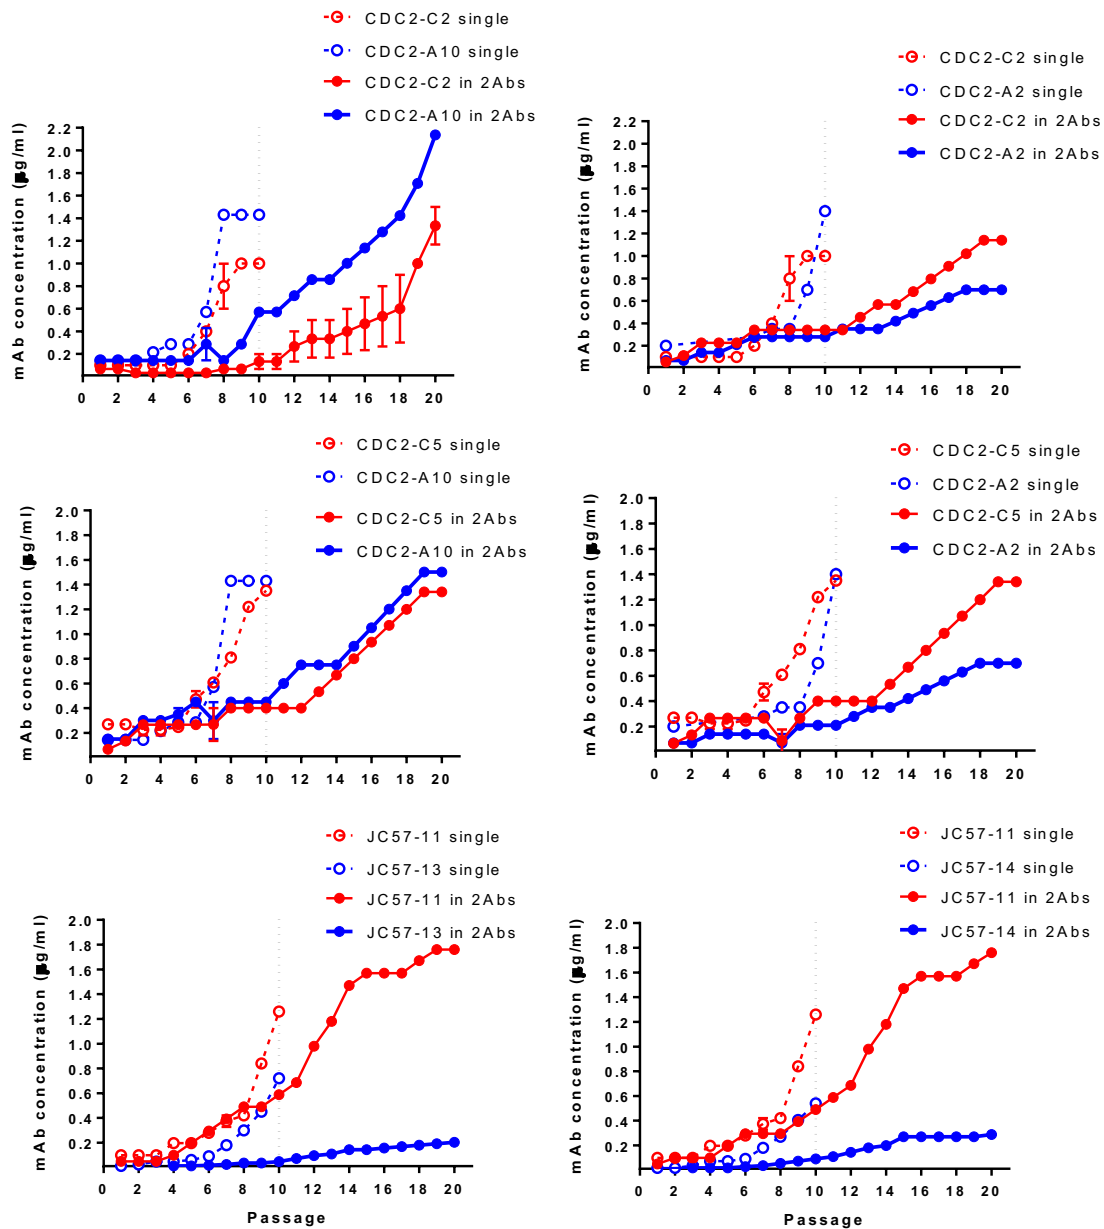

**Fig. S8. mAb concentrations used for selection of escape mutations.** MERS-CoV EMC/2012 was propagated in the presence of one or two mAbs. Cultures were carried for 10 and 20 serial passages under single- and double-mAb selection, respectively. The combinations of two mAbs, either RBD-specific plus S1-specific (CDC2-C2 + CDC2-A10, CDC2-C2 + CDC2-A2, CDC2-C5 + CDC2-A10, CDC2-C5 + CDC2-A2 and

JC57-11 + JC57-13) or two RBD-specific (JC57-11 + JC57-14) slowed viral adaptation to the presence of antibody, necessitating a shallower mAb concentration ramp and extended passaging to obtain escape-mutant viruses capable of efficient replication.

**Table S1. Crystallographic data collection and refinement statistics.**

Values in parentheses are for highest-resolution shell. n/a: not applicable.

|                                         | JC57-14 Fab                            | JC57-14 and<br><i>EnglandI</i> RBD        | CDC2-C2 and<br><i>EnglandI</i> RBD                        |
|-----------------------------------------|----------------------------------------|-------------------------------------------|-----------------------------------------------------------|
| <b>Data collection</b>                  |                                        |                                           |                                                           |
| Growth condition                        | 0.09 M CHES pH 9.5,<br>18% PEG 8,000   | 0.23 M ammonium<br>sulfate, 22% PEG 8,000 | 0.1 M Tris pH 6.5, 10%<br>2-Propanol, and 10%<br>PEG 3350 |
| Cryoprotectant                          | Mother liquor +<br>22% ethylene glycol | Mother liquor +<br>22% ethylene glycol    | Mother liquor +<br>20% ethylene glycol                    |
| Space group                             | $P2_1$                                 | $C222_1$                                  | $P2_12_12_1$                                              |
| Cell constants                          |                                        |                                           |                                                           |
| $a, b, c$ (Å)                           | 83.7, 129.8, 84.0                      | 81.6, 148.1, 259.0                        | 60.82, 166.85, 184.82                                     |
| $\alpha, \beta, \gamma$ (°)             | 90.0, 110.0, 90.0                      | 90.0, 90.0, 90.0                          | 90.0, 90.0, 90.0                                          |
| Wavelength (Å)                          | 1.00                                   | 1.00                                      | 0.9792                                                    |
| Resolution (Å)                          | 50.0-2.00 (2.07-2.00)                  | 50.0-3.30 (3.42-3.30)                     | 47.65-2.10 (2.14-2.10)                                    |
| $R_{\text{merge}}$                      | 12.0                                   | 14.6                                      | 0.128 (1.223)                                             |
| No. reflections                         | 269,908                                | 100,857                                   | 677,925 (33,386)                                          |
| No. unique reflections                  | 103,552                                | 21,926                                    | 107,760 (5202)                                            |
| $I / \sigma I$                          | 7.71 (2.12)                            | 9.96 (1.64)                               | 8.3 (2.2)                                                 |
| Completeness (%)                        | 90.8 (62.8)                            | 91.7 (54.4)                               | 97.7 (97.3)                                               |
| Redundancy                              | 2.8 (1.9)                              | 4.7 (2.9)                                 | 6.3 (6.4)                                                 |
| <b>Refinement</b>                       |                                        |                                           |                                                           |
| Resolution (Å)                          | 41.28-1.99                             | 42.44-3.32                                | 47.65-2.10                                                |
| $R_{\text{work}} / R_{\text{free}}$ (%) | 17.9 / 21.3                            | 22.0 / 27.0                               | 19.1 / 22.8                                               |
| No. atoms                               |                                        |                                           |                                                           |
| Protein                                 | 12951                                  | 9695                                      | 9519                                                      |
| Ligand/ion                              | 0                                      | 0                                         | 42                                                        |
| Water                                   | 927                                    | 0                                         | 719                                                       |
| $B$ -factors                            |                                        |                                           |                                                           |
| Protein                                 | 40.7                                   | 84.0                                      | 42.5                                                      |
| Ligand/ion                              | n/a                                    | n/a                                       | 74.9                                                      |
| Water                                   | 45.0                                   | n/a                                       | 46.3                                                      |
| R.m.s. deviations                       |                                        |                                           |                                                           |
| Bond lengths (Å)                        | 0.004                                  | 0.002                                     | 0.005                                                     |
| Bond angles (°)                         | 0.788                                  | 0.589                                     | 0.730                                                     |
| Ramachandran                            |                                        |                                           |                                                           |
| Preferred regions (%)                   | 97.03                                  | 94.74                                     | 98.6                                                      |
| Allowed regions (%)                     | 2.97                                   | 5.26                                      | 1.4                                                       |
| Outliers (%)                            | 0.00                                   | 0.00                                      | 0.00                                                      |

**Table S1. Crystallographic data collection and refinement statistics.**

**Table S2. Antibody interactions with MERS *England1* RBD.**

|                | JC57-14 antibody | MERS RBD       | Distance (Å) |
|----------------|------------------|----------------|--------------|
| Hydrogen bonds |                  |                |              |
|                | H:TYR33 [OH]     | R:GLU536 [N]   | 3.90         |
|                | H:TYR33 [OH]     | R:ASP539 [OD2] | 2.66         |
|                | L:ASN30 [ND2]    | R:ASN398 [O]   | 3.16         |
|                | L:TYR32 [OH]     | R:ASN398 [ND2] | 2.90         |
|                | L:TYR32 [OH]     | R:VAL530 [O]   | 3.69         |
|                | L:TYR49 [OH]     | R:GLU549 [OE1] | 3.08         |
|                | L:THR56 [OG1]    | R:LYS543 [NZ]  | 3.31         |
|                | L:ASN92 [O]      | R:SER532 [OG]  | 2.16         |
|                | L:THR56 [OG1]    | R:GLN544 [O]   | 3.60         |
| Salt bridges   |                  |                |              |
|                | L:ASP28 [OD2]    | R:LYS400 [NZ]  | 3.59         |
|                | L:GLU55 [OE2]    | R:LYS543 [NZ]  | 2.94         |
|                | CDC-C2 antibody  | MERS RBD       | Distance (Å) |
| Hydrogen bonds |                  |                |              |
|                | H:THR28 [OG1]    | B:ASP510 [OD1] | 3.28         |
|                | H:THR28 [OG1]    | B:TRP553 [OD2] | 3.09         |
|                | H:ILE31 [O]      | B:TYR540 [OH]  | 2.72         |
|                | H:ILE31 [O]      | B:ARG542 [NH1] | 3.30         |
|                | H:TYR33 [OH]     | B:ASP539 [OD2] | 2.66         |
|                | H:ILE53 [O]      | B:LYS502 [NZ]  | 2.92         |
|                | H:LYS73 [NZ]     | B:ARG511 [O]   | 2.87         |
|                | H:SER74 [O]      | B:ARG511 [NH2] | 3.05         |
|                | H:GLU95 [OE1]    | B:ARG542 [NH2] | 2.58         |
|                | H:GLU95 [OE2]    | B:ARG542 [NH1] | 2.78         |
|                | H:GLN99 [O]      | B:ARG542 [NH2] | 3.55         |
|                | H:CYS100B [N]    | B:TYR540 [O]   | 2.89         |
|                | H:CYS100B [O]    | B:TYR540 [N]   | 2.95         |
|                | H:SER100C [OG]   | B:ASP539 [OD1] | 3.67         |
|                | H:SER100C [OG]   | B:GLU536 [OE1] | 2.86         |
|                | H:GLY100D [N]    | B:ASP539 [OD1] | 2.60         |
|                | H:GLY100D [N]    | B:GLU536 [OE1] | 3.62         |
|                | L:HIS27D [NE2]   | B:GLU536 [OE1] | 2.93         |
|                | L:GLN93 [NE2]    | B:GLU536 [OE2] | 3.29         |
| Salt bridges   |                  |                |              |
|                | H:GLU95 [OE1]    | B:ARG542 [NH1] | 3.24         |
|                | H:GLU95 [OE2]    | B:ARG542 [NH1] | 2.77         |
|                | H:GLU95 [OE1]    | B:ARG542 [NH2] | 2.58         |
|                | H:GLU95 [OE2]    | B:ARG542 [NH2] | 3.69         |
|                | L:HIS27D [NE2]   | B:GLU536 [OE1] | 2.93         |

**Table S2. Antibody interactions with MERS *England1* RBD.**

**Table S3. Buried surface area of JC57-14 antibody in complex with MERS *England1* RBD.**

| <b>JC57-14 antibody</b>         |           |                                           |                                       |
|---------------------------------|-----------|-------------------------------------------|---------------------------------------|
| Residue                         | Bond Type | Accessible Surface Area (Å <sup>2</sup> ) | Buried Surface Area (Å <sup>2</sup> ) |
| H:GLN 1                         |           | 176.9                                     | 3.4                                   |
| H:SER 31                        |           | 95.6                                      | 3.8                                   |
| H:ASN 32                        |           | 39.1                                      | 19.7                                  |
| H:TYR 33                        | H         | 94.9                                      | 76.6                                  |
| H:ARG 50                        |           | 75.7                                      | 49.2                                  |
| H:SER 56                        |           | 52.1                                      | 33.0                                  |
| H:LYS 95                        |           | 18.6                                      | 4.5                                   |
| H:THR 96                        |           | 6.2                                       | 3.5                                   |
| H:TYR 97                        |           | 135.7                                     | 104.1                                 |
| H:SER 98                        |           | 92.4                                      | 65.9                                  |
| H:GLY 99                        |           | 49.5                                      | 11.0                                  |
| H:ASP 102                       |           | 63.2                                      | 21.6                                  |
| H:TYR 103                       |           | 95.0                                      | 21.9                                  |
| L:ASP 28                        |           | 102.1                                     | 27.1                                  |
| L:ASN 30*                       | H         | 88.2                                      | 75.0                                  |
| L:TYR 32                        | H         | 81.0                                      | 75.0                                  |
| L:TYR 49                        | H         | 107.3                                     | 76.4                                  |
| L:TYR 50*                       |           | 99.0                                      | 69.9                                  |
| L:SER 53                        |           | 44.2                                      | 9.3                                   |
| L:LEU 54                        |           | 77.6                                      | 20.8                                  |
| L:GLU 55*                       | S         | 51.4                                      | 24.5                                  |
| L:THR 56*                       | H         | 136.9                                     | 67.5                                  |
| L:GLY 57                        |           | 74.1                                      | 6.9                                   |
| L:VAL 58                        |           | 19.9                                      | 1.8                                   |
| L:TYR 91                        |           | 67.7                                      | 13.9                                  |
| L:ASN 92                        | H         | 53.7                                      | 27.4                                  |
| L:TYR 96                        |           | 129.5                                     | 29.3                                  |
| <b>MERS <i>England1</i> RBD</b> |           |                                           |                                       |
| Residue                         | Bond Type | Accessible Surface Area (Å <sup>2</sup> ) | Buried Surface Area (Å <sup>2</sup> ) |
| R:PRO 394                       |           | 12.8                                      | 2.0                                   |
| R:TYR 397                       |           | 1.4                                       | 1.4                                   |
| R:ASN 398                       | H         | 35.8                                      | 33.9                                  |
| R:PHE 399                       |           | 2.4                                       | 2.4                                   |
| R:LYS 400                       | S         | 99.9                                      | 63.5                                  |
| R:TYR 523                       |           | 86.6                                      | 14.3                                  |
| R:VAL 527                       |           | 50.1                                      | 36.4                                  |
| R:SER 528                       |           | 95.4                                      | 84.8                                  |
| R:ILE 529                       |           | 27.2                                      | 26.2                                  |
| R:VAL 530                       | H         | 11.8                                      | 11.8                                  |
| R:PRO 531                       |           | 27.2                                      | 27.2                                  |
| R:SER 532                       | H         | 83.7                                      | 68.7                                  |
| R:TRP 535                       |           | 182.1                                     | 157.8                                 |
| R:GLU 536                       | H         | 118.8                                     | 36.6                                  |
| R:ASP 539                       | H         | 39.2                                      | 19.3                                  |
| R:TYR 540                       |           | 132.1                                     | 12.5                                  |
| R:TYR 541                       |           | 25.9                                      | 24.1                                  |
| R:ARG 542                       |           | 153.4                                     | 39.8                                  |
| R:LYS 543                       | HS        | 118.1                                     | 118.1                                 |
| R:GLN 544                       | H         | 97.0                                      | 22.3                                  |
| R:LEU 545                       |           | 23.0                                      | 6.4                                   |
| R:SER 546                       |           | 37.3                                      | 36.8                                  |
| R:PRO 547                       |           | 119.2                                     | 5.37                                  |
| R:LEU 548                       |           | 155.9                                     | 18.2                                  |
| R:GLU 549                       | H         | 87.6                                      | 32.7                                  |
| R:TRP 553                       |           | 88.4                                      | 3.3                                   |

Residues that form hydrogen bonds and salt bridges are indicated.

\* light chain contact residues mutated from germline during somatic mutation.

**Table S3. Buried surface area of JC57-14 antibody in complex with MERS *England1* RBD.**

**Table S4. Buried surface area of CDC2-C2 antibody in complex with MERS *England1* RBD.**

| <b>CDC-C2 antibody</b>          |           |                                           |                                       |
|---------------------------------|-----------|-------------------------------------------|---------------------------------------|
| Residue                         | Bond Type | Accessible Surface Area (Å <sup>2</sup> ) | Buried Surface Area (Å <sup>2</sup> ) |
| H:GLY 27                        |           | 73.1                                      | 7.5                                   |
| H:THR 28                        | H         | 80.8                                      | 68.4                                  |
| H:PHE 29                        |           | 25.6                                      | 1.5                                   |
| H:SER 30                        |           | 18.5                                      | 16.2                                  |
| H:ILE 31*                       | H         | 85.6                                      | 85.6                                  |
| H:TYR 32                        |           | 47.0                                      | 25.9                                  |
| H:ILE 52                        |           | 14.9                                      | 7.5                                   |
| H:ILE 53                        | H         | 112.2                                     | 101.8                                 |
| H:PHE 54                        |           | 155.2                                     | 94.1                                  |
| H:LYS 73                        | H         | 160.6                                     | 76.1                                  |
| H:SER 74                        | H         | 92.9                                      | 26.1                                  |
| H:THR 75                        |           | 63.6                                      | 0.8                                   |
| H:SER 76                        |           | 28.0                                      | 9.5                                   |
| H:GLU 95                        | S         | 6.3                                       | 6.2                                   |
| H:GLY 97                        |           | 22.2                                      | 6.6                                   |
| H:GLN 99                        | H         | 88.0                                      | 10.2                                  |
| H:GLY 100                       |           | 87.4                                      | 19.5                                  |
| H:TYR 100A                      |           | 162.6                                     | 96.0                                  |
| H:CYS 100B                      | H         | 39.8                                      | 39.6                                  |
| H:SER 100C                      | H         | 79.0                                      | 21.0                                  |
| H:GLY 100D                      | H         | 93.3                                      | 56.3                                  |
| H:GLY 100E                      |           | 40.8                                      | 25.3                                  |
| L:HIS 27D                       | HS        | 78.3                                      | 45.6                                  |
| L:SER 27E                       |           | 113.9                                     | 26.6                                  |
| L:ASN 28                        |           | 80.0                                      | 33.0                                  |
| L:GLN 93                        | H         | 154.8                                     | 23.1                                  |
| <b>MERS <i>England1</i> RBD</b> |           |                                           |                                       |
| Residue                         | Bond Type | Accessible Surface Area (Å <sup>2</sup> ) | Buried Surface Area (Å <sup>2</sup> ) |
| B:ASN 501                       |           | 46.4                                      | 1.4                                   |
| B:LYS 502                       | H         | 80.5                                      | 45.0                                  |
| B:SER 504                       |           | 1.3                                       | 0.7                                   |
| B:PHE 506                       |           | 67.4                                      | 65.5                                  |
| B:ASP 510                       | H         | 83.9                                      | 34.0                                  |
| B:ARG 511                       | H         | 197.8                                     | 94.1                                  |
| B:THR 512                       |           | 55.8                                      | 0.2                                   |
| B:GLU 513                       |           | 86.1                                      | 28.6                                  |
| B:TRP 535                       |           | 212.1                                     | 106.0                                 |
| B:GLU 536                       | H         | 116.0                                     | 84.3                                  |
| B:ASP 537                       |           | 87.5                                      | 7.3                                   |
| B:GLY 538                       |           | 46.4                                      | 23.2                                  |
| B:ASP 539                       | H         | 32.3                                      | 32.3                                  |
| B:TYR 540                       | H         | 129.4                                     | 129.2                                 |
| B:TYR 541                       |           | 31.5                                      | 21.0                                  |
| B:ARG 542                       | HS        | 161.3                                     | 138.5                                 |
| B:TRP 553                       |           | 91.3                                      | 64.3                                  |
| B:VAL 555                       |           | 26.6                                      | 26.6                                  |
| B:ALA 556                       |           | 0.8                                       | 0.8                                   |
| B:SER 557                       |           | 17.9                                      | 13.6                                  |

Residues that form hydrogen bonds and salt bridges are indicated.  
 \* Contact residue mutated from germline during somatic mutation.

**Table S4. Buried surface area of CDC2-C2 antibody in complex with MERS *England1* RBD.**



**Table S5. Structurally characterized antibody contact region and source.**

| Antibody       | PDB ID | Heavy chain area (Å <sup>2</sup> ) | Light chain area (Å <sup>2</sup> ) | Source                      |
|----------------|--------|------------------------------------|------------------------------------|-----------------------------|
| <b>JC57-14</b> |        | 404                                | 520                                | Non-human primate - vaccine |
| D12            | 4ZPT   | 485                                | 523                                | Mouse - vaccine             |
| 4C2            | 5DO2   | 508                                | 505                                | Mouse - vaccine             |
| MERS27         | 4ZS6   | 402                                | 283                                | Yeast display scFv library  |
| <b>CDC2-C2</b> |        | 794                                | 130                                | Human - infection           |
| m336           | 4XAK   | 770                                | 110                                | Naïve IgM antibody library  |
| MCA1           | 5GMQ   | 827                                | 120                                | Human - infection           |

**Table S5. Structurally characterized antibody contact region and source.**
